# Supplementary material
Source: Elsevier journal article supplement (https://www.sciencedirect.com/science/article/pii/S1885585720300360)
Supplement: mmc1 [file S1885585720300360:mmc1.pdf]

## The sex gap in hypertrophic cardiomyopathy

### Supplemental data

#### Supplemental table 1

Electrocardiogram, stress echocardiography and cardiac magnetic resonance data in patients with hypertrophic cardiomyopathy

|                                                                                                                                                                                         | Men (n = 613) | Women (n = 429) | <i>P</i> |
|-----------------------------------------------------------------------------------------------------------------------------------------------------------------------------------------|---------------|-----------------|----------|
| <i>ECG</i>                                                                                                                                                                              | 613 (100)     | 429 (100)       | 1.000    |
| Repolarization abnormalities                                                                                                                                                            | 462 (76.5)    | 336 (78.3)      | .268     |
| LV hypertrophy by Sokolow-Lyon criteria                                                                                                                                                 | 353 (57.6)    | 244 (56.9)      | .820     |
| Left-bundle branch block                                                                                                                                                                | 25 (4.1)      | 24 (5.6)        | .255     |
| Right-bundle branch block                                                                                                                                                               | 57 (9.3)      | 34 (7.9)        | .440     |
| <i>Stress ECG</i>                                                                                                                                                                       | 286 (46.6)    | (36.5)          | .001     |
| <i>Holter</i>                                                                                                                                                                           | 514 (83.8)    | 353 (82.3)      | .436     |
| <i>Stress echocardiography</i>                                                                                                                                                          | 117 (19.4)    | 58 (13.7)       | .018     |
| Presence of LVOT gradient $\geq 30$ mmHg                                                                                                                                                | 72 (61.5)     | 35 (60.4)       | .933     |
| Maximum LVOT gradient, mmHg                                                                                                                                                             | 69.5 $\pm$ 52 | 60.6 $\pm$ 44.2 | .504     |
| <i>Cardiac magnetic resonance imaging</i>                                                                                                                                               | 298 (49.1)    | 177 (41.7)      | .020     |
| Presence of LGE                                                                                                                                                                         | 233 (78.2)    | 116 (65.5)      | .001     |
| LGE in $\geq 10\%$ of the LV mass (% within LGE+)                                                                                                                                       | 116 (49.8)    | 66 (56.9)       | .393     |
| ECG, electrocardiogram; LGE, late gadolinium enhancement; LVOT, left ventricular outflow tract; LV, left ventricular<br>Data are expressed as No. (%) or mean $\pm$ standard deviation. |               |                 |          |

## Supplemental table 2

Baseline characteristics of patients with no ICD

|                                                                                                                                                          | Men (n = 264) | Women (n = 197) | P    |
|----------------------------------------------------------------------------------------------------------------------------------------------------------|---------------|-----------------|------|
| <i>Age at the initial evaluation, y</i>                                                                                                                  | 49 (18)       | 54 ± 19         | .066 |
| <i>Symptoms</i>                                                                                                                                          | 175 (66.3)    | 145 (73.6)      | .147 |
| <i>Heart Failure</i>                                                                                                                                     | 71 (26.9)     | 84 (42.8)       | .002 |
| - NYHA II                                                                                                                                                | 54 (20.4)     | 65 (32.9)       | .007 |
| - NYHA ≥ III                                                                                                                                             | 11 (4.2)      | 15 (7.8)        | .149 |
| <i>Mitral regurgitation (moderate or severe)</i>                                                                                                         | 30 (11.5)     | 38 (19.2)       | .044 |
| <i>LVEF, %</i>                                                                                                                                           | 64 (11)       | 65 (11)         | .457 |
| <i>LVOT obstruction</i>                                                                                                                                  | 105 (39.8)    | 77 (38.9)       | .867 |
| <i>Previous stroke</i>                                                                                                                                   | 9 (3.4)       | 9 (4.5)         | .754 |
| <i>Atrial fibrillation</i>                                                                                                                               | 28 (10.5)     | 17 (8.4)        | .464 |
| <i>Hypertension</i>                                                                                                                                      | 114 (43.1)    | 85 (43.2)       | .993 |
| <i>Chronic kidney disease</i>                                                                                                                            | 8 (3.2)       | 5 (2.4)         | .756 |
| <i>Neoplastic diseases</i>                                                                                                                               | 8 (3.2)       | 9 (4.5)         | .818 |
| <i>Chronic pulmonary obstructive disease</i>                                                                                                             | 22 (8.5)      | 17 (8.4)        | .993 |
| NYHA, New York Heart Association; LVEF, left ventricle ejection fraction; LVOT, left ventricular outflow tract.<br><b>Data are expressed as No. (%).</b> |               |                 |      |
